# Supplementary material for: <em>Lactobacillus</em> on Recovering of Immune-Damage by Chemotherapy (Cancer Treatment)
Source: Preprints.org preprint supplement (doi:10.20944/preprints202202.0218.v1), 2022-02-17
Supplement: Supplementary file 1 [file supplementary]

| Sample | Kingdom | Phylum | Class | Order | Family | Genus | Species | Unclass. |
| --- | --- | --- | --- | --- | --- | --- | --- | --- |
| C101 | 45 | 0 | 1 | 4 | 7 | 24 | 79 | 0 |
| C103 | 33 | 0 | 3 | 9 | 7 | 29 | 121 | 0 |
| C105 | 36 | 2 | 3 | 6 | 8 | 24 | 110 | 0 |
| IM015 | 24 | 2 | 1 | 8 | 5 | 22 | 100 | 0 |
| IM021 | 149 | 2 | 0 | 3 | 4 | 26 | 109 | 0 |
| IM024 | 52 | 0 | 2 | 3 | 5 | 31 | 116 | 0 |
| L102 | 87 | 0 | 3 | 8 | 6 | 25 | 111 | 0 |
| L103 | 53 | 1 | 1 | 4 | 5 | 20 | 121 | 0 |
| L104 | 66 | 0 | 1 | 5 | 9 | 27 | 117 | 0 |
| M201 | 54 | 0 | 2 | 6 | 4 | 18 | 100 | 0 |
| M202 | 64 | 1 | 3 | 3 | 4 | 25 | 127 | 0 |
| M203 | 43 | 2 | 4 | 10 | 9 | 31 | 137 | 0 |
| H105 | 54 | 0 | 1 | 9 | 6 | 24 | 104 | 0 |
| H204 | 25 | 1 | 3 | 5 | 4 | 22 | 80 | 0 |
| H205 | 19 | 1 | 4 | 6 | 2 | 24 | 106 | 0 |

**Table S3.** Classification of OTUs at different taxonomic levels in ungrouped samples of rats related to cancer chemotherapy and *Lactobacillus* treatment. C101-C105: Control; IM105-IM024: Immune-damaged (chemotherapy); L102-L104: Low *Lactobacillus*; M201-203: Middle *Lactobacillus*; H105-H205: High *Lactobacillus*.
