# Supplementary material for: <em>Lactobacillus</em> on Recovering of Immune-Damage by Chemotherapy (Cancer Treatment)
Source: Preprints.org preprint supplement (doi:10.20944/preprints202202.0218.v1), 2022-02-17
Supplement: Supplementary file 2 [file Yueetal.Cancers2022-TableS1.doc]

| Sample | Input | Filtered | Denoised | Merged | Non-Chimeric | Non-singleton |
| --- | --- | --- | --- | --- | --- | --- |
| C101 | 36735 | 33459 | 33215 | 32960 | 32354 | 32354 |
| C103 | 41605 | 37560 | 37452 | 37208 | 36992 | 36990 |
| C105 | 40015 | 36429 | 36278 | 35963 | 35785 | 35785 |
| IM015 | 40436 | 36951 | 36826 | 36302 | 35678 | 35678 |
| IM021 | 36977 | 33960 | 33781 | 33054 | 32762 | 32760 |
| IM024 | 37872 | 34532 | 34287 | 33735 | 32757 | 32756 |
| L102 | 43722 | 40199 | 39992 | 38825 | 38435 | 38435 |
| L103 | 42425 | 38696 | 38455 | 37735 | 35648 | 35647 |
| L104 | 36911 | 33632 | 33456 | 31924 | 31258 | 31258 |
| M201 | 43221 | 39824 | 39603 | 39114 | 33637 | 33637 |
| M202 | 40112 | 36652 | 36378 | 36107 | 35096 | 35095 |
| M203 | 39357 | 35909 | 35697 | 35386 | 34506 | 34505 |
| H105 | 42251 | 38421 | 38168 | 37516 | 36332 | 36332 |
| H204 | 35862 | 32553 | 32414 | 32158 | 31939 | 31939 |
| H205 | 38597 | 35209 | 35009 | 34811 | 33888 | 33888 |

**Table S1.** Sequencing quantity of samples (groups of rats related to cancer chemotherapy and *Lactobacillus* treatment). C: Control; IM: Immune-damaged (chemotherapy); L: Low *Lactobacillus*; M: Middle *Lactobacillus*; H: High *Lactobacillus*.
