# Supplementary material for: <em>Lactobacillus</em> on Recovering of Immune-Damage by Chemotherapy (Cancer Treatment)
Source: Preprints.org preprint supplement (doi:10.20944/preprints202202.0218.v1), 2022-02-17
Supplement: Supplementary file 3 [file Yueetal.Cancers2022-TableS2.doc]

| Sample | Phylum | Class | Order | Family | Genus | Species |
| --- | --- | --- | --- | --- | --- | --- |
| C101 | 7 | 18 | 24 | 34 | 41 | 42 |
| C103 | 6 | 17 | 28 | 46 | 60 | 66 |
| C105 | 4 | 15 | 25 | 36 | 48 | 61 |
| IM015 | 5 | 13 | 21 | 32 | 43 | 53 |
| IM021 | 5 | 16 | 27 | 34 | 52 | 55 |
| IM024 | 4 | 14 | 23 | 40 | 54 | 61 |
| L102 | 4 | 15 | 26 | 37 | 53 | 63 |
| L103 | 6 | 16 | 26 | 40 | 52 | 61 |
| L104 | 6 | 18 | 24 | 40 | 51 | 59 |
| M201 | 3 | 11 | 17 | 31 | 42 | 50 |
| M202 | 5 | 16 | 27 | 42 | 51 | 68 |
| M203 | 6 | 20 | 36 | 51 | 71 | 72 |
| H105 | 6 | 16 | 26 | 36 | 45 | 54 |
| H204 | 5 | 15 | 22 | 32 | 40 | 46 |
| H205 | 6 | 17 | 25 | 41 | 58 | 69 |

**Table S2.** OTU number of samples (groups of rats related to cancer CTX chemotherapy

and *Lactobacillus* treatment) at each taxonomic level. C: Control; H: High *Lactobacillus*;

IM: Immune-damaged (chemotherapy); M: Middle *Lactobacillus*; L: Low *Lactobacillus*.
