# Supplementary material for: <em>Lactobacillus</em> on Recovering of Immune-Damage by Chemotherapy (Cancer Treatment)
Source: Preprints.org preprint supplement (doi:10.20944/preprints202202.0218.v1), 2022-02-17
Supplement: Supplementary file 5 [file Yueetal.Cancers2022-TableS4.doc]

| Sample | Chao1 | Simpson | Shannon | Pielou_e | Observed_species | Goods_coverage |
| --- | --- | --- | --- | --- | --- | --- |
| C101 | 160.117 | 0.939320 | 5.03256 | 0.687327 | 160.0 | 0.999973 |
| C103 | 202.134 | 0.944731 | 5.55388 | 0.725354 | 201.8 | 0.999919 |
| C105 | 188.925 | 0.956764 | 5.58547 | 0.738749 | 188.8 | 0.999960 |
| H105 | 197.775 | 0.944657 | 5.41996 | 0.710613 | 197.7 | 0.999970 |
| H204 | 140.000 | 0.938022 | 5.14059 | 0.721053 | 140.0 | 0.999987 |
| H205 | 161.933 | 0.921820 | 4.93072 | 0.671856 | 161.9 | 0.999970 |
| IM015 | 162.000 | 0.948120 | 5.28492 | 0.720030 | 162.0 | 0.999987 |
| IM021 | 293.287 | 0.941470 | 5.57123 | 0.679853 | 293.0 | 0.999906 |
| IM024 | 209.026 | 0.946974 | 5.28697 | 0.686025 | 208.9 | 0.999946 |
| L102 | 240.165 | 0.952320 | 5.51966 | 0.698242 | 239.7 | 0.999899 |
| L103 | 205.331 | 0.914413 | 4.83482 | 0.629692 | 204.8 | 0.999896 |
| L104 | 225.000 | 0.965279 | 5.90992 | 0.756346 | 225.0 | 0.999993 |
| M201 | 184.059 | 0.852203 | 4.05408 | 0.539021 | 183.7 | 0.999899 |
| M202 | 228.063 | 0.949533 | 5.49914 | 0.702115 | 227.9 | 0.999953 |
| M203 | 235.925 | 0.950196 | 5.41961 | 0.68759 | 235.9 | 0.999973 |

**Table S4.** Alpha-diversity index table of microbial community in five groups of rats related to cancer chemotherapy and *Lactobacillus* treatment. C: Control; H: High *Lactobacillus*; IM: Immune-damaged (chemotherapy); M: Middle *Lactobacillus*; L: Low *Lactobacillus*.
